# Supplementary material
Source: PubMed Central journal article supplement (PMC9297071)
Supplement: sj-pdf-1-ajh-10.1177_10499091211064833.pdf [file sj-pdf-1-ajh-10.1177_10499091211064833.pdf]

**Supplementary Table 1.** ICD-10 codes associated with comorbidities in COVID-19 positive patients admitted to hospice.

| Comorbidity                                  | ICD-10 Codes                                                                                                                                         |
|----------------------------------------------|------------------------------------------------------------------------------------------------------------------------------------------------------|
| Cancer                                       | C34.90, C44.519, C44.611, C44.622, C44.629, C44.712, C50.919, C54.1, C61, C64.2, C64.9, C67.9, D04.5, D04.60, D04.62, D04.71, G89.3, Z80.51, Z86.007 |
| Congestive Heart Failure (CHF)               | I50.22, I50.30, I50.32, I50.33, I50.42, I50.43, I50.810, I50.812, I50.813, I50.9                                                                     |
| Chronic Obstructive Pulmonary Disease (COPD) | J44.1, J44.9                                                                                                                                         |
| Diabetes                                     | E08.21, E08.40, E11.21, E11.22, E11.40, E11.42, E11.49, E11.51, E11.59, E11.621, E11.628, E11.65, E11.69, E11.8, E11.9, R73.03                       |
| Hypertension                                 | I10, I15.8, I15.9                                                                                                                                    |
| Kidney Disease                               | E08.21, E11.21, E11.22, I12.9, N17.0, N17.9, N18.30, N18.5, N18.6, N18.9, N28.9, S37.009A                                                            |
